# Supplementary material
Source: publisher figshare collection journal article supplement (https://aacr.figshare.com/articles/dataset/_/22432515)
Supplement: Supplementary file 1 [file 39878904]

**A**

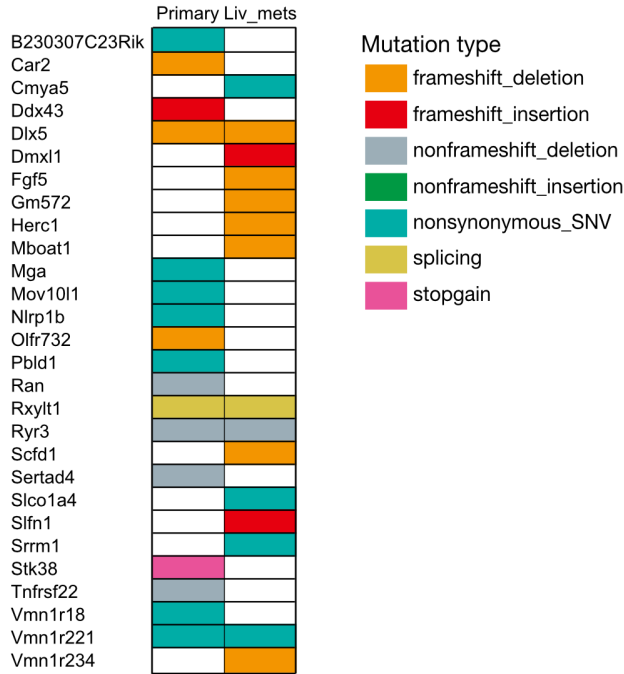

**B**

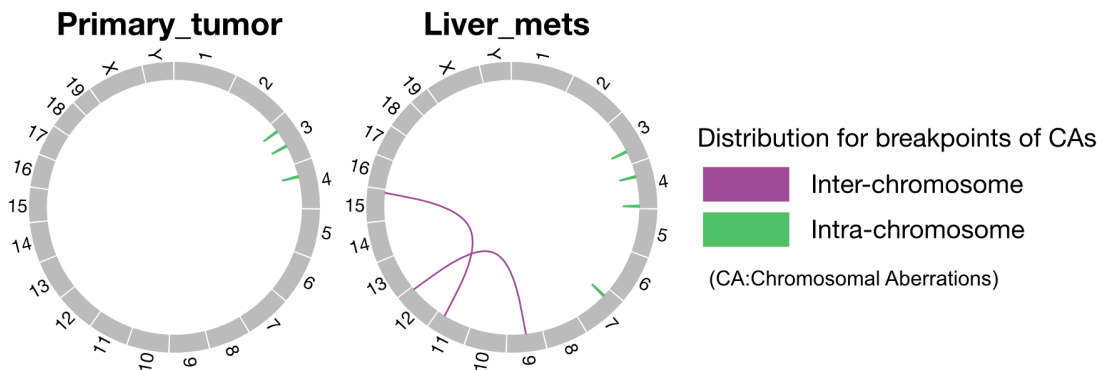

**Supplementary Figure S4. Gene mutations and chromosomal breakpoints**

**identified in primary tumors and liver metastases of CKPS mice. (A)** List of gene mutations in a primary cecal tumor and liver metastasis of CKPS mice identified by exome analysis. **(B)** Distribution of chromosomal breakpoints in a primary cecal tumor and liver metastases of CKPS mice identified by exome analysis.
